# Supplementary material for: Clinical decision support must be useful, functional is not enough: a qualitative study of computer-based clinical decision support in primary care
Source: PubMed Central journal article supplement (PMC3508894; doi:10.1186/1472-6963-12-349), 2012-10-08
Supplement: 1472-6963-12-349-S1.pdf [file 1472-6963-12-349-S1.pdf]

## Additional file 2a Patient specific automatic reminders and guideline links on the electronic patient record screen: a patient with diabetes as an example

There are three trigger events in the electronic patient record that elicit or update patient-specific clinical decision support on the left side of the screen:

- opening the patient record
- recording a new diagnosis
- prescribing a new medication

Case: A patient with diabetes (Name: EBMEDS DIABEETIKKO, ID: 010160), for whom four reminders and eleven diagnosis based guideline links (below) were automatically triggered when the physician opened the patient record.

The screenshot shows a web-based interface for an electronic patient record. The main window title is "Mediatri - EBMEDS DIABEETIKKO - 010160 - [Sisätautikertomus]". The interface is divided into several sections:

- Patient List (Suositut):** A list of patients, with "EBMEDS DIABEETIKKO 010160" selected. Other patients listed include "JARJESTELMA", "SISATAUTI PKL", and "MANAGERMAALIND".
- Patient Details:** A pane showing patient information for "EBMEDS DIABEETIKKO 010160", including name, ID, and date of birth (29.6.2010).
- Decision support:** A pane with a "Reminders" section. It lists four reminders: "Type 2 diabetes – start aspirin?", "Type 2 diabetes – no results for LDL-cholesterol available", "Diabetes – time for the annual follow-up appointment?", and "Type 2 diabetes – time for nephropathy screening?".
- Guideline Links:** A section titled "Diagnosis based guideline links" with a list of 11 links, including "Metabolinen oireyhtymä (Lääkärin käsitelmä)", "Diabeteksen kappä hoito -suositus (Kappä hoito)", "Diagnostiikka diabeteksen tyypin 2 diabeteksen hoidossa (Lääkärin käsitelmä)", "Tyypin 2 diabeteksen hoito ja seuranta (Lääkärin käsitelmä)", "Insuliinihoito tyypin 2 diabeteksen hoidossa (Lääkärin käsitelmä)", "Elämäntapaohje tyypin 2 diabeteksen hoidossa (Lääkärin käsitelmä)", "Tuore tyypin 2 diabetes (Lääkärin käsitelmä)", "Diabeteksen määrittely, ensidiagnoosi ja luokitus (Lääkärin käsitelmä)", "Diabeettinen nefropatia (Kappä hoito)", "Diabeettinen nefropatia (Kappä hoito)", and "Raskausdiabetes (Kappä hoito)".

A text box on the left side of the screenshot contains the text: "4 reminders and 11 diagnosis based guideline links to the national health portal (www.terveysportti.fi)". Arrows point from this text box to the "Reminders" and "Diagnosis based guideline links" sections of the decision support pane.

A short version of the reminders is shown automatically. When the mouse cursor is placed over the reminder, a long version appears on the screen. If the user is a nurse, additional information relevant for nurses is shown in the reminder.
