# Supplementary material for: Clinical decision support must be useful, functional is not enough: a qualitative study of computer-based clinical decision support in primary care
Source: PubMed Central journal article supplement (PMC3508894; doi:10.1186/1472-6963-12-349), 2012-10-08
Supplement: 1472-6963-12-349-S2.pdf [file 1472-6963-12-349-S2.pdf]

## Additional file 2b Patient specific drug interaction alert function on the electronic patient record screen

In the prescription procedure decision support checks automatically on the patient medication list whether the drug (ibuprofen 400 mg) has an interaction with the previous medication and sends a pop up figure with an interaction alert and a suggestion of drug change.

The screenshot shows a software interface for selecting medication. At the top, there are search filters: 'Hakualue:' (All drugs), 'Rajaa:' (By name), 'Rajaus:' (Content: Ibuprofen), and 'Paino:' (Weight: 70 kg). Below these is a list of search results for 'Ibuprofen-Ratiopharm Ratiopharm', including 'tabletti, kalvopäällysteinen 400 mg 10 fol (1,85 / 0,19)', 'ibuprofeeni: 1x3', 'Oma annostus...', 'tabletti, kalvopäällysteinen 400 mg 20 fol (3,42 / 0,17)', and 'tabletti, kalvopäällysteinen 400 mg 30 fol (4,24 / 0,14)'. A 'Check' dialog box is overlaid on the bottom right, containing a warning: 'Potilaan käyttämällä Marevan Forte-lääkkeellä on interaktioita valitun lääkkeen kanssa!'. The dialog explains that NSAID use increases bleeding risk in patients on warfarin and suggests alternative treatments like PPIs. It asks 'Haluatko valita toisen lääkkeen?' (Do you want to choose another drug?) with 'Kyllä' (Yes) and 'Ei' (No) buttons.
