# Supplementary material for: Clinical decision support must be useful, functional is not enough: a qualitative study of computer-based clinical decision support in primary care
Source: PubMed Central journal article supplement (PMC3508894; doi:10.1186/1472-6963-12-349), 2012-10-08
Supplement: 1472-6963-12-349-S3.pdf [file 1472-6963-12-349-S3.pdf]

## Additional file 2c Virtual health check results within the physician's appointment schedule

User (Name: MANAGER MAUNO) can run a virtual health check (VHC) on her/his patients in the appointment schedule. This happens when the user clicks on the decision support document in her/his folder (step 1). All patient-specific decision support messages appear on the right side of the screen (step 2). Patient specific reminders (short versions), drug alerts and guideline links appear when the user clicks on the specific CDS link (steps 3).

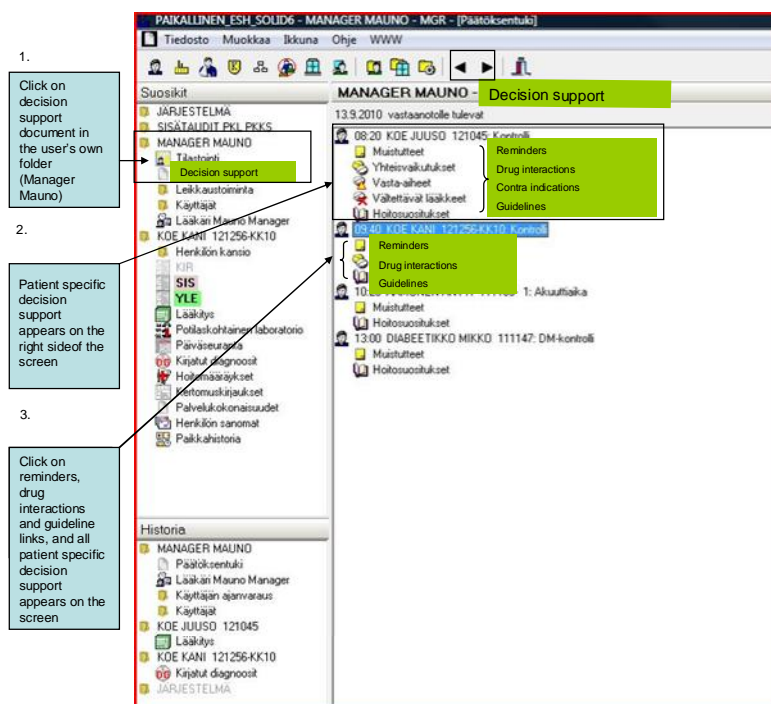

In the next figure all the patient specific (Name: KOE KANI) reminders, interaction alerts and diagnosis-based guideline links are shown. The long versions of the reminders with additional sentences for nurses can be seen when the mouse cursor is placed over the reminder (step 4).

Tiedosto Muokkaa Ikkuna Ohje WWW

Suosikit

JÄRJESTELMÄ  
 SISÄTAUDIT PKL PKKS  
 MANAGER MAUNO  
 Tilastointi  
 Päätöksentekijä  
 Leikkauksentekijä  
 Käyttäjät  
 Lääkäri Mauno Manager

MANAGER MAUNO - Decision support

13.9.2010 vastaanotolle tulevat

08:20 KOE JUUSO 121045: Kontrolli

Muistutukset  
 Yhteisvaikutukset  
 Vasta-aiheet  
 Vältettävät lääkkeet  
 Hoitosuositukset

09:40 KOE KANI 121256:KK10: Kontrolli

Reminders

- Potilaalla on ollut sydäninfarkti - aloita beetasalpaaja? Recent myocardial infarction - start a beta-blocker?
- Verenpainetauti eikä tuoreita verensokeriarvoja - kontrolli verensokeri? Hypertension and no recent glucose values - check blood glucose
- Välittömästi eikä tuoreita verensokeriarvoja - kontrolli verensokeri? Atherosclerotic disease and no recent glucose values - check blood glucose?
- Verenpainetauti - verensokerikontrollin aika? Hypertension- time to check blood pressure?

Drug interaction alerts

Volaren ja Marevan Forte: Tulehduskipulääkkeiden (NSAID:t) käyttöä tulisi yleisesti välttää varainhoidetuilla potilailla

Guideline links

- DG Herpes zoster (B02)
- DG Infarctus myocardi recidivus (I22)
- DG Angina pectoris (I20)
- DG Hypertensio essentialis (primaria) (I10)
- DG Asthma bronchiale (J45)
- DG Tuberculosis pulmonum microscopia spuī confirmata cum sine cultura (A15.0)
- DG Keski- masenn + som.oi. (F32.11)
- DG Psychosis serenis NAS (F03)
- DG Abdomen acutum (R10.0)
- DG Ulcus duodeni (K26)
- DG Fibrillatio atriorum (I48)

10:20 AAMUNEN ANTTI 111183- T: Akuutti-aika

Muistutukset  
 Hoitosuositukset

13:00 DIABEETIKKO MIKKO 111147: DM-kontrolli

Muistutukset  
 Hoitosuositukset

Historia

MANAGER MAUNO  
 Päätöksentekijä  
 Lääkäri Mauno Manager  
 Käyttäjän ajankäyttö  
 Käyttäjät  
 KOE JUUSO 121045  
 Lääkäri

KOE KANI 121256:KK10

The user can switch the date by using specific arrow keys

Step 4

This patient has been diagnosed with hypertension. Over one year has passed since the last structurally recorded blood pressure measurement. Organised systems that involve regular follow-up have been found to improve the control of hypertension.
